# Supplementary material
Source: publisher figshare collection journal article supplement (https://karger.figshare.com/articles/dataset/_/7642241)
Supplement: Supplementary file 2 [file 1]

# International Exploratory Workshop on Cancer Cascade Genetic Screening in Switzerland

Basel, 20 – 22 September 2017

Regenzimmer, 1<sup>st</sup> floor, Kollegienhaus, University of Basel

Petersplatz 1, 4001 Basel

Registration: Ms. Heike Heinemann [heike.heinemann@unibas.ch](mailto:heike.heinemann@unibas.ch)

| Day 1.<br>Wednesday September 20 <sup>th</sup> 2017 |                                                                                                                                                                                                                                                                                                                                                                                                                                                                                                                                                                                                                                             | Day 2.<br>Thursday September 21 <sup>st</sup> 2017 |                                                                                                                                                                                                                                                                                                                                                                                                                                 | Day 3.<br>Friday September 22 <sup>nd</sup> 2017 |                                                                                                                                                                                                                                                                                                                                                                                                                                                                                                                                      |
|-----------------------------------------------------|---------------------------------------------------------------------------------------------------------------------------------------------------------------------------------------------------------------------------------------------------------------------------------------------------------------------------------------------------------------------------------------------------------------------------------------------------------------------------------------------------------------------------------------------------------------------------------------------------------------------------------------------|----------------------------------------------------|---------------------------------------------------------------------------------------------------------------------------------------------------------------------------------------------------------------------------------------------------------------------------------------------------------------------------------------------------------------------------------------------------------------------------------|--------------------------------------------------|--------------------------------------------------------------------------------------------------------------------------------------------------------------------------------------------------------------------------------------------------------------------------------------------------------------------------------------------------------------------------------------------------------------------------------------------------------------------------------------------------------------------------------------|
| 9:00-9:15                                           | <b>Prof. Dr. Maria Katapodi, PhD, RN, FAAN</b><br>Welcome, Objectives                                                                                                                                                                                                                                                                                                                                                                                                                                                                                                                                                                       | 9:00-9:15                                          | <b>Prof. Dr. Maria Katapodi, PhD, RN, FAAN</b><br>Welcome, Objectives                                                                                                                                                                                                                                                                                                                                                           | 9:00-9:15                                        | <b>Prof. Dr. Maria Katapodi, PhD, RN, FAAN</b><br>Welcome, Objectives                                                                                                                                                                                                                                                                                                                                                                                                                                                                |
| 9:15-11:30<br><br>w/<br>coffee<br>break             | <b>Prof. Dr. Eric Sijbrands, MD, PhD</b><br>Erasmus University, The Netherlands<br><ul style="list-style-type: none"> <li>Cascade screening and biobank for Familial Hypercholesterolemia (FH) in the Netherlands</li> <li>From research to implementation (1999 to 2017)</li> <li>Scientific insights from 15 years of genetic screening for FH</li> </ul>                                                                                                                                                                                                                                                                                 | 9:15-11:00<br><br>w/<br>coffee<br>break            | <b>Prof. Heather L. Hampel, MS, LGC</b><br><b>The Ohio State University, Comprehensive Cancer Center, USA</b> <ul style="list-style-type: none"> <li>State-wide efforts in Ohio for cascade genetic testing for LS</li> <li>NASEM/NAM Action Collaborative on Genomics and Population Health</li> </ul>                                                                                                                         | 9:15-11:30<br><br>w/<br>coffee<br>break          | <b>PD Dr. Christian Kurzeder, MD, PhD</b><br>Gynäkologische Onkologie, Universitätsspital Basel, Switzerland<br><ul style="list-style-type: none"> <li>Young women - breast cancer, ovarian cancer, endometrial cancer</li> <li>High-risk clinics and collaboration for surveillance</li> </ul>                                                                                                                                                                                                                                      |
| 11:30-12:30                                         | <b>Prof. Dr. Nicole Probst-Hensch, MPH</b><br>Swiss Tropical and Public Health Institute, Switzerland<br><ul style="list-style-type: none"> <li>Population-based reference data to support cancer cascade genetics screening</li> </ul>                                                                                                                                                                                                                                                                                                                                                                                                     | 11:00-12:30                                        | <b>Dr. Zanfina Ademi, MPH, PhD</b><br>European Center for Pharmaceutical Medicine, University of Basel, Switzerland<br><b>Prof. Dr. Simon Wieser, PhD</b><br>ZHAW School of Management and Law, Health Economic Research, Switzerland<br><ul style="list-style-type: none"> <li>Cost-effectiveness cascade genetic screening for FH</li> <li>Modeling cost-effectiveness cascade genetic screening for HBOC &amp; LS</li> </ul> | 11:30-12:30                                      | <b>Prof. Maria Caiata-Zufferey, PhD</b><br>University of Applied Sciences and Arts of Southern Switzerland<br><ul style="list-style-type: none"> <li>Challenges in patient-provider communication for hereditary cancer risk</li> </ul>                                                                                                                                                                                                                                                                                              |
| 12:30-13:30                                         | Lunch Break                                                                                                                                                                                                                                                                                                                                                                                                                                                                                                                                                                                                                                 | 12:30-13:30                                        | Lunch Break                                                                                                                                                                                                                                                                                                                                                                                                                     | 12:30-13:30                                      | Lunch Break                                                                                                                                                                                                                                                                                                                                                                                                                                                                                                                          |
| 13:30-16:30<br><br>w/<br>coffee<br>break            | <b>Prof. Dr. Pierre Chappuis, MD and Dr. Valeria Viassolo, MD</b><br>Hôpitaux Universitaires Genève, Switzerland<br><b>Prof. Dr. med. Dr. phil Karl Heinemann, MD, PhD</b><br>Universitätsspital Basel, Switzerland<br><ul style="list-style-type: none"> <li>HBOC &amp; LS in Switzerland: State of the Art</li> <li>Challenges of establishing cancer cascade genetic screening for HBOC &amp; LS in Switzerland</li> </ul> <b>Prof. Dr. Maria Katapodi, PhD, RN, FAAN</b><br>University of Basel, Switzerland<br><ul style="list-style-type: none"> <li>Progress, challenges, and preliminary findings from the CASCADE study</li> </ul> | 13:30-15:30<br><br>w/<br>coffee<br>break           | <b>Prof. Dr. Victoria Champion, PhD, RN, FAAN</b><br>Population Sciences, Simon Cancer Center & School of Nursing, Indiana University, USA<br><ul style="list-style-type: none"> <li>Establishing inter-professional collaboration for research in basic science, epidemiology, and translational studies</li> <li>Challenges and opportunities for partnerships with academia, clinical sites, and industry</li> </ul>         | 13:30-15:00<br><br>15:00-15:30                   | <b>Prof. Dr. Laurel Northouse, PhD, RN, FAAN</b><br>University of Michigan School of Nursing, USA<br><ul style="list-style-type: none"> <li>Family challenges in cancer survivorship</li> <li>Family-based interventions for psychosocial support and communication</li> </ul><br><b>Prof. Dr. Maria Katapodi, PhD, RN, FAAN</b><br>University of Basel, Switzerland<br><ul style="list-style-type: none"> <li>Swiss Cancer Predisposition Cascade Screening Consortium: governance, collaboration, intellectual property</li> </ul> |
| 16:30-17:00                                         | <b>Discussion –</b><br>Pragmatic approach to cascade cohort and genetic testing for HBOC & LS<br>Prof. Dr. Sijbrands, Prof. Dr. Probst-Hensch, Prof. Dr. Chappuis, Prof. Dr. Heinemann, Prof. Dr. Katapodi                                                                                                                                                                                                                                                                                                                                                                                                                                  | 15:30-17:00                                        | <b>Discussion –</b><br>Setting priorities for cascade genetic screening for HBOC & LS, including cost-effectiveness<br>Stakeholders and academic-clinical-industry partnerships<br>Prof. Hampel, Dr. Ademi, Prof. Dr. Wieser, Prof. Dr. Champion, Prof. Dr. Katapodi                                                                                                                                                            | 15:30-16:30                                      | <b>Discussion –</b><br>Coordination for surveillance<br>Swiss-based interventions for patient-provider and patient-family communication<br>Conclusions and closing remarks<br>Dr. Kurzeder, Dr. Caiata-Zufferey, Prof. Dr. Northouse, Prof. Dr. Katapodi                                                                                                                                                                                                                                                                             |
| 17:00-18:00                                         | <b>Apero</b>                                                                                                                                                                                                                                                                                                                                                                                                                                                                                                                                                                                                                                |                                                    |                                                                                                                                                                                                                                                                                                                                                                                                                                 |                                                  |                                                                                                                                                                                                                                                                                                                                                                                                                                                                                                                                      |
