# Supplementary material
Source: publisher figshare collection journal article supplement (https://karger.figshare.com/articles/dataset/_/7642241)
Supplement: Supplementary file 3 [file 1]

Archive with 2 entries (2 files):
- 496495sm_2.pdf
- 496495sm_1.pdf
